# Supplementary material for: Humoral immunity prevents clinical malaria during Plasmodium relapses without eliminating gametocytes
Source: PLoS Pathog. 2019 Sep 19;15(9):e1007974. doi: 10.1371/journal.ppat.1007974 (PMC6752766; doi:10.1371/journal.ppat.1007974)
Supplement: S9 Table — (XLSX) [file ppat.1007974.s021.xlsx]

## Sheet: Sheet1
Panel 3											Panel 4
ANTIBODY	FLUOROPHORE	CLONE	COMPANY	CATALOGUE #	TITRATION (µl)						ANTIBODY	FLUOROPHORE	CLONE	COMPANY	CATALOGUE #	TITRATION (µl)
CD14	Pacific Blue	M5E2	BD	558121	5						Live/Dead	Yellow	N/A	Invitrogen	L34959	2
Live/Dead	Yellow	N/A	Invitrogen	L34959	2						CD14	BV605	M5E2	Biolegend	301834	5
CD20	BV650	2H7	Biolegend	302336	1						CD20	BV650	2H7	Biolegend	302336	1
IgM	Alexa488	2020-30	Southern Biotech	2020-30	2						CD38	FITC	AT-1	Stem Cell Technologies	60131FI	5
CD3	PerCP-Cy5.5	SP-34-2	BD	552852	5						CD3	PerCP-Cy5.5	SP-34-2	BD	552852	5
IgD	PE	2030-09	Southern Biotech	2030-09	5						IgD	PE	2030-02	Southern Biotech	2030-09	5
CD21	PE-CF594	B-LY4	BD	563474	10						CD21	PE-CF594	B-LY4	BD	563474	10
CD27	PE-Cy7	M-T271	Biolegend	356412	10						CD27	PE-Cy7	M-T271	BD	356412	10
CD19	APC-Alexa700	J3-119	Beckman Coulter	A78837	10						CD19	APC-Alexa700	J3-119	Beckman Coulter	A78837	10
CD45	APC-Cy7	D058-1283	BD	552566	0.5						CD45	APC-Cy7	D058-1283	BD	552566	0.5
IgG	Alexa647	4700-31	Southern Biotech	4700-31	5						KI67	BV421	B56	BD	562899	5
Fc Block	N/A	N/A	Biolegend	422302	10						Caspase-3	Alexa647	C92-605	BD	560626	10
											Fc Block	N/A	N/A	Biolegend	422302	10
